# Supplementary material for: A new miniMOS tool kit capable of visualizing single copy insertion in C. elegans
Source: PeerJ. 2023 May 17;11:e15433. doi: 10.7717/peerj.15433 (PMC10199674; doi:10.7717/peerj.15433)
Supplement: Supplemental Information 2 [file peerj-11-15433-s002.xlsx]

## Sheet: Sheet1
Table S1. strains made in this study
Strain name	Genotype	Discription
PSC214	N2; scnEx154	scnEx154[pYW241; Peft-3::Mos1; Punc-122::GFP; Plin-44::GFP(pYW146)]
PSC215	zipt-17(ok745); scnEx155	scnEx155[pYW249; Peft-3::Mos1; Punc-122::DsRed; Pmyo-2::mCherry]
PSC190	scnSi21 IV	scnSi21 IV [Mos1 transposon containing PSer-1::SER-1::GFP inserted into the downstream locus of cutl-24 at AC of ggaggaaaagttatgtttatACagtatatgaaggcatc]
PSC192	scnSi23 IV	scnSi23 IV [Mos1 transposon containing Ptph-1::GFP inserted to the downstream locus of fbxa-28 at GT of ttggtgaagccagagaGTaatttatttggtgaagtca]
PSC216	zipt-17(ok745); psme-3(scn17); scnSi26 III	scnSi26 III [Mos1 transposon containing wildtype zipt-17 genomic fragment inserted into the first intron of psme-3 at AA of caaaatttaaagaaattttctctgtAAtttttttttcaacgcgaaaaaaaaacca]
PSC291	scnSi29 IV	scnSi29 IV [scnSi21 with LoxP-flanking fragment excised]
PSC292	scnSi30 IV	scnSi30 IV [scnSi23 with LoxP-flanking fragment excised]
PSC325	zipt-17(ok745); psme-3(scn17); scnSi41 III	scnSi41 III [scnSi26 with LoxP-flanking fragment excised].
