# Supplementary material for: A new miniMOS tool kit capable of visualizing single copy insertion in C. elegans
Source: PeerJ. 2023 May 17;11:e15433. doi: 10.7717/peerj.15433 (PMC10199674; doi:10.7717/peerj.15433)
Supplement: Supplemental Information 3 [file peerj-11-15433-s003.xlsx]

## Sheet: Sheet1
Table S2. Molecular cloning strategies for newly constructed plasmids.
Name of the Plasmid	Primer Set	Fragment Length	PCR Template	Plasmid Length	Plasmid Sequence
pYW241	ypr875/a-118 ypr677/ypr876	5.3 kb 6.1 kb	pYW392 pYW347	11426bp	GCACCGTACGTCTCGAGGAATTCTATCAGGTGTACAAGTATGAAATGTCGTTTCGAACATATAGATGTCTCGCAAACGTAAATATTTATCGATTGTCATAAAACTTTGACCTTGTGAAGTGTCAACCTTGACTGTCGAACCACCATAGTTTGGCGCGAATTGAGCGTCATAATTGTTTACTCTCAGTGCAGTCAACATGTCGAGTTTCGTGCCGAATAAAGAGCAAACGCGGACAGTATTAATTTTCTGTTTTCATTTGAAGAAAACAGCTGCGGccggatccaggaaacagctatgaccatgATTACGCCAAGCTTAATAGGGAGTGCAAGACTATTAGGGAGTGCAATACTAATTTTCAGAACAATTTTCAGACTTTGAGCTTACTATTTTTTTCTG…
pYW347	ypr1096/ypr329 ypr330/ypr764	1.75 kb 5.76 kb	pYW112 pYW256	7476bp	GCACCGTACGTCTCGAGGAATTCTATCAGGTGTACAAGTATGAAATGTCGTTTCGAACATATAGATGTCTCGCAAACGTAAATATTTATCGATTGTCATAAAACTTTGACCTTGTGAAGTGTCAACCTTGACTGTCGAACCACCATAGTTTGGCGCGAATTGAGCGTCATAATTGTTTACTCTCAGTGCAGTCAACATGTCGAGTTTCGTGCCGAATAAAGAGCAAACGCGGACAGTATTAATTTTCTGTTTTCATTTGAAGAAAACAGCTGCGGccggatccaggaaacagctatgaccatgATTACGCCAAGCTACGTAATACGACTCACTAGgataaatgcaaaatcctttcaagcattcccttcttctctatcactcttctttctttttgtcaaa…
pYW249	a-200/a-201 a-202/ypr270 ypr586/a-203 ypr587/ypr920	5.8 kb 1.9 kb 615 bp 4.6 kb	genomic DNA pYW256 genomic DNA pYW256	12691bp	agctgataccGCACCGTACGTCTCGAGGAATTCTATCAGGTGTACAAGTATGAAATGTCGTTTCGAACATATAGATGTCTCGCAAACGTAAATATTTATCGATTGTCATAAAACTTTGACCTTGTGAAGTGTCAACCTTGACTGTCGAACCACCATAGTTTGGCGCGAATTGAGCGTCATAATTGTTTACTCTCAGTGCAGTCAACATGTCGAGTTTCGTGCCGAATAAAGAGCAAACGCGGACAGTATTAATTTTCTGTTTTCATTTGAAGAAAACAGCTGCGGccggatccaggaaacagctatgaccatgATTCTAGCTCGAATTTCCAACTAGGAGAACATTTTCGCGCCTTTCTTGGAAAGGGAGATTTTATGAACTCCAAGTCATATTATAAA…
pYW146	ypr442/ypr222 ypr443/ypr410	4.4 kb 1.3 kb	pYW011 genomic DNA	5712bp	gtaagtttaaacatgatcttactaactaactattctcatttaaattttcagagcttaaaaatggctgaaatcactcacaacgatggatacgctaacaacttggaaatgaaataagcttgcatgcctgcaggtcgactctagaggatccccgggattggatcaatggcaatccaatcttgtgtccgtttttacgatgcgagacgattcctcccttttacctccaatttcgttttgattagtcaacggatgggagagtaaagggagaaggaggaatgtgttatgatagggagaaattcaatttctggttagtcattactttgagagaaaccgctgatcatttgtttaattgttgtttacaattagtggaacaattaaagaaagttgcaaaaaaaaaaaaac…
pYW242	ypr587/ypr764 ypr1096/ypr876 ypr875/ypr1022	2.9kb 4.1kb 8.9kb	YW245 YW347 YW211	15947bp	atagtcctgtcgggtttcgccacctctgacttgagcgtcgatttttgtgatgctcgtcaggggggcggagcctatggaaaaacgccagcaacgcggcctttttacggttcctggtcttttgctggccttttgctcacatgttctttcctgcgttatcccctgattctgtggataaccgtattaccgcctttgagtgagctgataccGCACCGTACGTCTCGAGGAATTCTATCAGGTGTACAAGTATGAAATGTCGTTTCGAACATATAGATGTCTCGCAAACGTAAATATTTATCGATTGTCATAAAACTTTGACCTTGTGAAGTGTCAACCTTGACTGTCGAACCACCATAGTTTGGCGCGAATTGAGCGTCATAATTGTTTACTCTCAGTGCAGTC…
pYW186	ypr590/ypr591 ypr592/ypr593	243bp 3556bp	YW134 YW134	3765bp	ATGACCATGATTACGCCAAGCTTgattgtagtttggatcaccaaaaacggaacgttgagctggacggaaatagtggtaaagtgacatgattatagtttgaagatttctaatttcacaattagagcaaatgttgttcggtatttattttcaacggtatttatactattttccacctttttctagaacattcgagctgcttgttgcaaaaggagggcgactcacattcggtacatggaaaagtagtgtacacaataaagagacccagatacattttccgtctgcgtctctttgcacccaccgggagtattttcaaacgaatgcatctaggaccttctagaacattctgtaaggctgcagaatgcgggtatataaggaaagcgggctcagaggaagccaaca…
