# Supplementary material for: A new miniMOS tool kit capable of visualizing single copy insertion in C. elegans
Source: PeerJ. 2023 May 17;11:e15433. doi: 10.7717/peerj.15433 (PMC10199674; doi:10.7717/peerj.15433)
Supplement: Supplemental Information 4 [file peerj-11-15433-s004.xlsx]

## Sheet: Sheet1
Table S3. Primers used in this study.
Primer	Sequence
a-118	aggattttgcatttatcatttgtatagttcatccatgc
a-200	cagctatgaccatgattctagctcgaatttccaactaggag
a-201	ggcctgtcgacctcgagggatacagcacataggaagctac
a-202	tcttcaatcgtaagttgcgc
a-203	caacttacgattgaagaatgccaccaaagccatctg
ypr222	atgagtaaaggagaagaac
ypr270	ctcgaggtcgacaggcctgcat
ypr329	gttgaagagtaattggacttacttgtacagctcgtcc
ypr330	gtccaattactcttcaacatc
ypr410	gttcttctcctttactcatcacgctgtgtcacctcgaa
ypr442	ttgatccaatcccggggatc
ypr443	tccccgggattggatcaatggcaatccaatcttgtgtc
ypr586	gagccacctccgcctcccgagcccttgctggaagtgtacttgg
ypr587	ggaggcggaggtggctctatgagtaaaggagaagaac
ypr590	aaatctacatgtatcttgatctgcc
ypr591	tattctggcatgggtcaatg
ypr592	tgacccatgccagaatatgctcttatcattgaactctg
ypr593	aagatacatgtagattttgaaaatctttacaagagcaagta
ypr677	gataaatgcaaaatcctttcaagc
ypr764	gaagaactcgtcaagaaggc
ypr875	gcgtgggtcacgcggtatcat
ypr876	taccgcgtgacccacgctca
ypr920	aatcatggtcatagctgtttcc
ypr1022	gagccacctccgcctcccgagcccaagaatgtttccttgatggcac
ypr1096	ttcttgacgagttcttctagcattttatatctgagtagtacc
P1	aatcatggtcatagctgtttcc
P2	gataaatgcaaaatcctttcaagc
P3	ctcgaggtcgacaggcctgcat
P4	tgtccttcatcacaccatgg
P5	cgtggcgagaaataccttgtc
P6	gaagagccagtcgccagaac
P7	gtgcccattaacatcaccatc
P8	ctcgaggtcgacaggcctgcat
P9	ttcaaagtatttgccgtcgc
P10	ctccggatattagattgtgtgg
P11	cgtggtgcagtcatatggtc
P12	acattccgaacttcggacag
