# Supplementary material for: A new miniMOS tool kit capable of visualizing single copy insertion in C. elegans
Source: PeerJ. 2023 May 17;11:e15433. doi: 10.7717/peerj.15433 (PMC10199674; doi:10.7717/peerj.15433)
Supplement: Supplemental Information 5 [file peerj-11-15433-s005.xlsx]

## Sheet: Sheet1
Table S4. injection mix used in this study
for generating PSC190	YW242(ser1::GFP miniMOS), 15ng/uL; CFJ2475(smu-2p::Mos1), 15ng/uL; YW135(myo2p::GFP), 5ng/uL; YW186(hsp16.41p::peel-1), 5ng/uL; pUC19, 60ng/uL
for generating PSC192	YW241(tph-1p::GFP miniMOS), 17.1ng/uL; CFJ601(eft3p::Mos1), 30ng/uL; CC::GFP, 30ng/uL; YW146(lin44p::GFP), 32.5ng/uL
for generating PSC216	YW249(zipt-17 genomic rescue_miniMOS), 30ng/uL; CFJ601(eft3p::Mos1), 30ng/uL; CC::DsRed, 39ng/uL; CFJ90(myo2p::mCherry), 7.5ng/uL
for removing LoxP flanked fragment	pDD104(eft3p::Cre), 30ng/uL; CFJ90, 5ng/uL; CC::DsRed, 40ng/uL; pUC19, 30ng/uL
for removing LoxP flanked fragment	pDD104(eft3p::Cre), 30ng/uL; CC::DsRed, 40ng/uL; YW146(lin44p::GFP), 32.5ng/uL
mix 1 for testing insertion ratio, without peel-1 plasmid	YW469(mex5p::GFP miniMOS), 30ng/uL; CFJ601(eft3p::Mos1), 30ng/uL; CFJ90(myo2p::mCherry), 5ng/uL; CFJ104(myo3p::mCherry), 5ng/uL; pUC19, 30ng/uL
mix 2 for testing insertion ratio, with peel-1 plasmid	YW469(mex5p::GFP miniMOS), 30ng/uL; CFJ601(eft3p::Mos1), 30ng/uL; CFJ90(myo2p::mCherry), 5ng/uL; CFJ104(myo3p::mCherry), 5ng/uL; pUC19, 20ng/uL; YW186(hsp16.41p::peel-1), 10ng/uL
