# Supplementary material for: A new miniMOS tool kit capable of visualizing single copy insertion in C. elegans
Source: PeerJ. 2023 May 17;11:e15433. doi: 10.7717/peerj.15433 (PMC10199674; doi:10.7717/peerj.15433)
Supplement: Supplemental Information 6 [file peerj-11-15433-s006.xlsx]

## Sheet: Sheet1
Table S5. Efficiency comparison among different miniMOS protocols
P0 animals used for injection		without peel-1 selection			with peel-1 selection
		worm #1	worm #2	worm #3	worm #1	worm #2	worm #3
single F1 (G418 resistant plus visible injection marker)		28	26	32	26	25	37
insertion candidates identified by G418 resistance plus absence of the injection marker		3	1	5	2	2	5
insertions*	with H2B::GFP	2 (1)	1 (1)	3 (2)	1 (1)	1 (1)	4 (2)
	without H2B::GFP	1 (0)	0 (0)	2 (1)	1 (0)	1 (0)	1 (0)
insertion ratio (%)	by JEM protocol	10.7143	3.84615	15.625	7.69231	8	13.5135
	by our protocol	7.14286	3.84615	9.375	3.84615	4	10.8108
average insertion ratio (%)	by JEM protocol	10.0618			9.73527
	by our protocol	6.788			6.21899
* the numbers in the blankets indicate the number of worms suceeded in insertion locus identification.
